# Supplementary material for: Using a discrete choice experiment to value the QLU-C10D: feasibility and sensitivity to presentation format
Source: Springer Nature journal article supplement (doi:10.1007/s11136-015-1115-3), 2015-09-05
Supplement: MOESM2 [file 793736]

**Table 4: Ease and Clarity of task, by layout**

| N(%) | Clarity |  |  |  |  |
| --- | --- | --- | --- | --- | --- |
|  | Very unclear | Unclear | Neither clear nor unclear | Clear | Very clear |
| Text and table | 4 (1%) | 21 (5%) | 70 (17%) | 220 (52%) | 108 (26%) |
| Yellow highlight version | 7 (2%) | 16 (4%) | 64 (15%) | 225 (53%) | 111 (26%) |
| N(%) | Difficulty |  |  |  |  |
|  | Very difficult | Difficult | Neither easy nor difficult | Easy | Very easy |
| Text and table | 32 (8%) | 118 (28%) | 124 (29%) | 112 (26%) | 37 (9%) |
| Yellow highlight version | 23 (5%) | 142 (34%) | 119 (28%) | 103 (24%) | 36 (9%) |
